# Supplementary material for: DeepPhenoMem V1.0: deep learning modelling of canopy greenness dynamics accounting for multi-variate meteorological memory effects on vegetation phenology
Source: Copernicus journal article supplement (doi:10.5194/gmd-17-6683-2024), 2024-09-12
Supplement: Supplementary file 1 [file gmd-17-6683-2024-supplement.pdf]

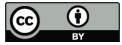

*Supplement of*

## **DeepPhenoMem V1.0: deep learning modelling of canopy greenness dynamics accounting for multi-variate meteorological memory effects on vegetation phenology**

**Guohua Liu et al.**

*Correspondence to:* Guohua Liu ([gliu@bgc-jena.mpg.de](mailto:gliu@bgc-jena.mpg.de))

The copyright of individual parts of the supplement might differ from the article licence.

# Supplementary

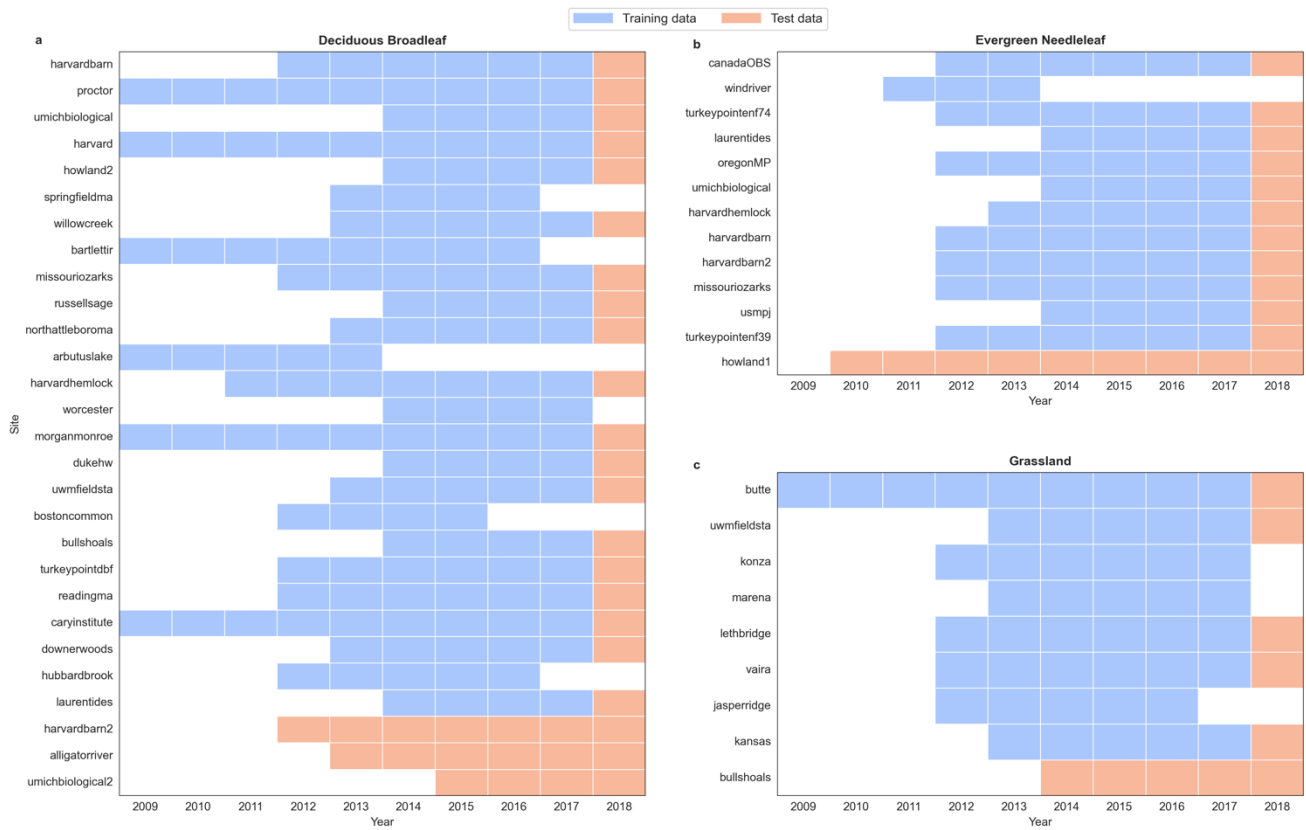

Fig. S1 The training (light blue box) and testing (light orange box) site-year for deciduous broadleaf (a), evergreen needleleaf (b) and grassland (c).

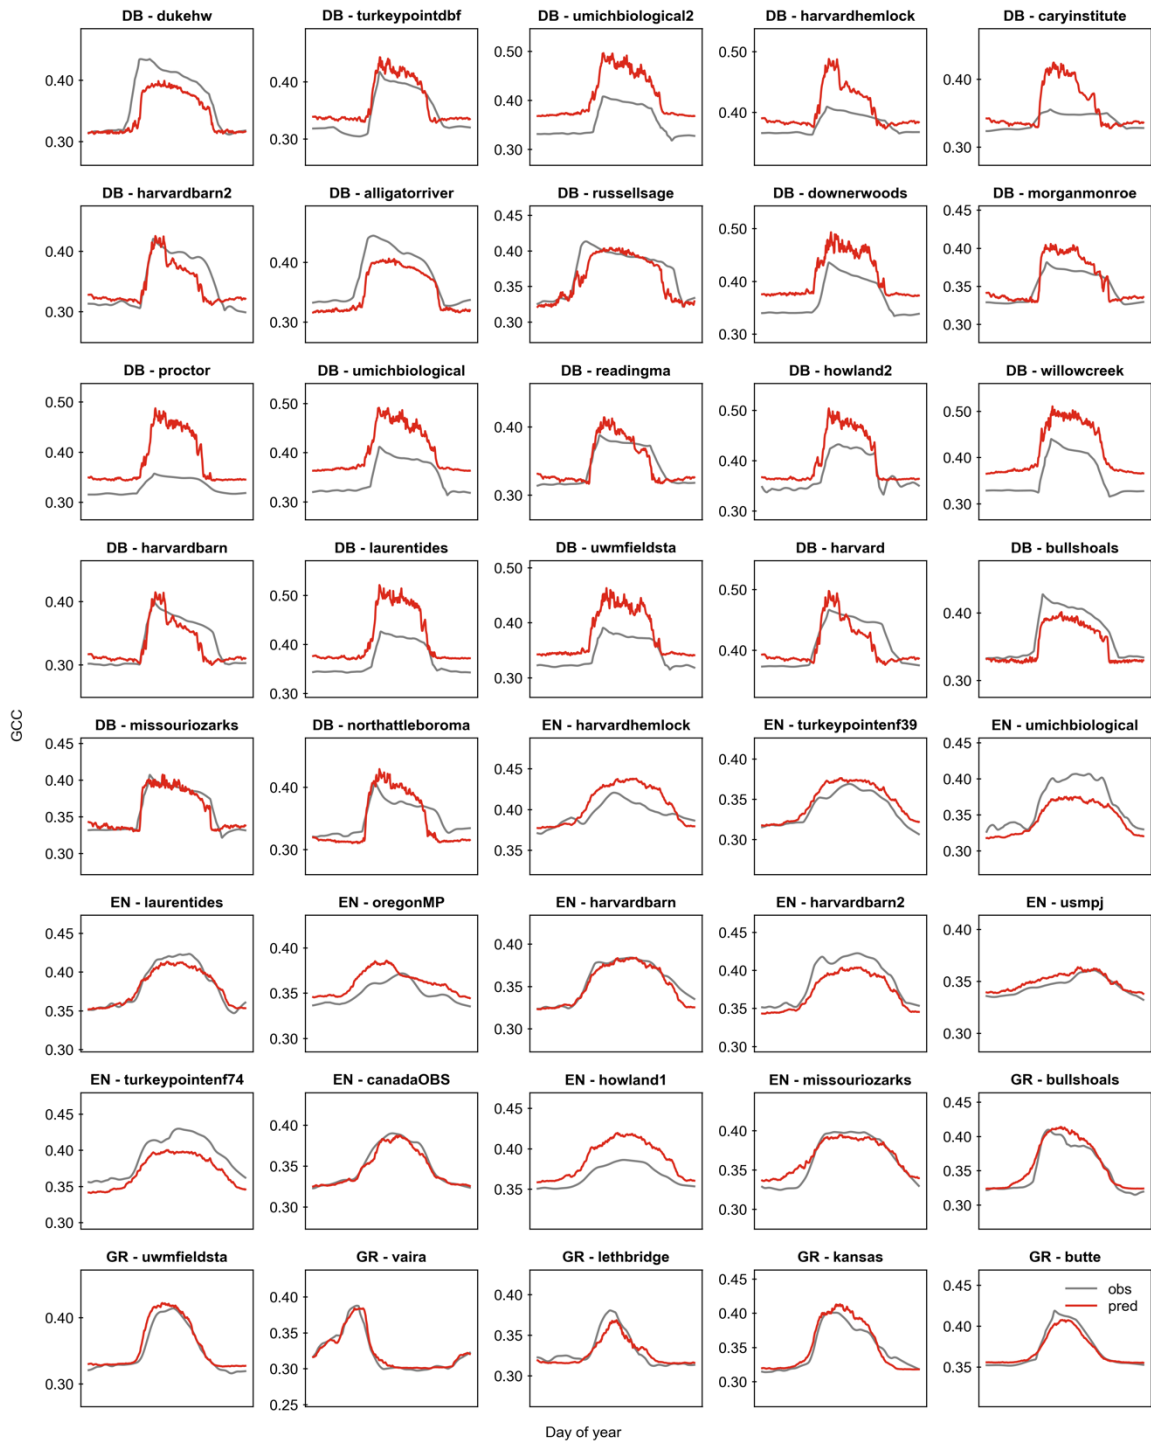

5

Fig. S2 Observed (obs, grey) and predicted (pred, red) daily canopy greenness (GCC) for each site of deciduous broadleaf (DB), evergreen needleleaf (EN) and grassland (GR) in 2018.

10

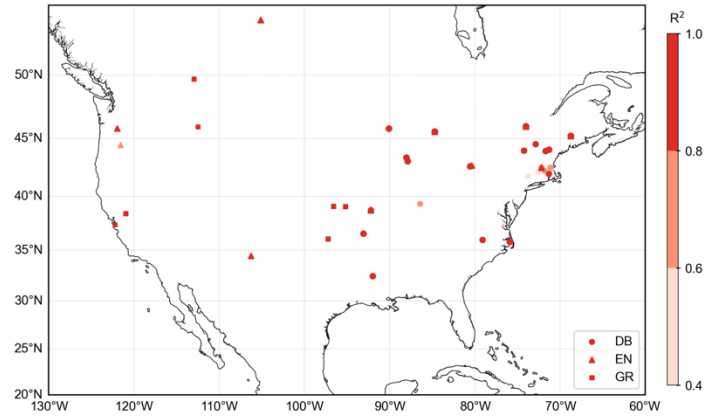

Fig. S3 The spatial distributions of  $R^2$  from  $M_{full}$  for deciduous broadleaf (DB, circle), evergreen needleleaf (EN, triangle) and grassland (GR, square).

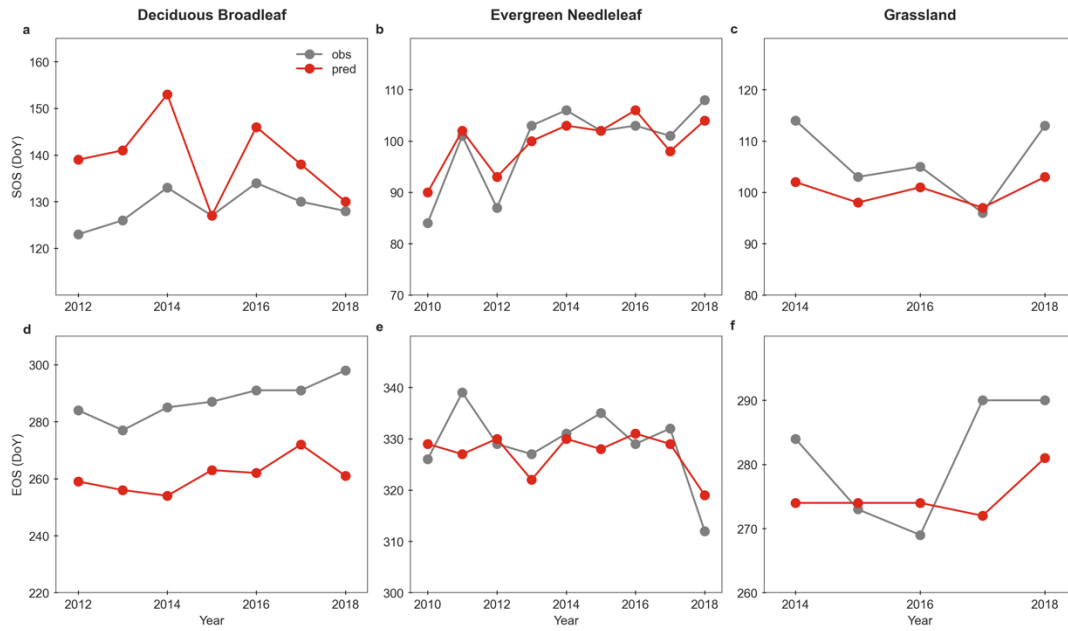

15

Fig. S4 Observed (obs, grey line) and predicted (pred, red line) the interannual variability in start of season (SOS, **a**, **b**, **c**) and end of season (EOS, **d**, **e**, **f**) for deciduous broadleaf, evergreen needleleaf and grassland in unseen sites (DB: harvardbarn2, EN: howland1, GR: bullshoals).

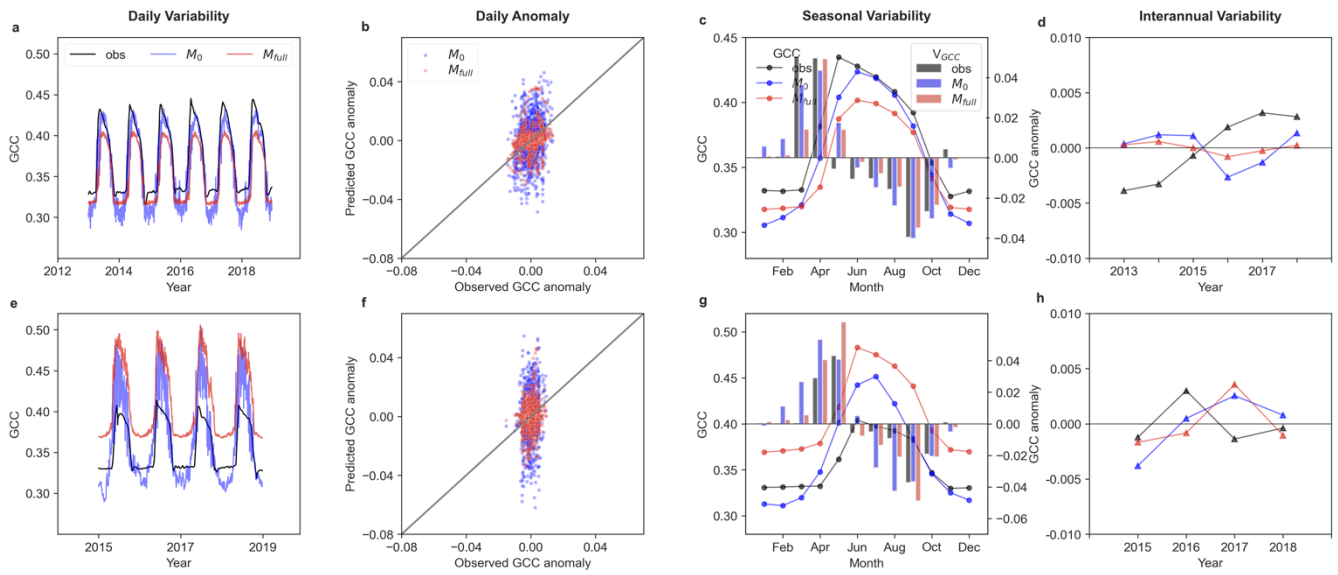

20

Fig. S5 Observed (obs, grey) and predicted ( $M_0$ : blue,  $M_{full}$ : red) daily (a, e), seasonal (c, g), and interannual (d, h) variability of canopy greenness (GCC) and daily GCC anomaly (b, f) for deciduous broadleaf (DB) at two unseen sites alligatorriver (a, b, c, d) and umichbiological2 (e, f, g, h)

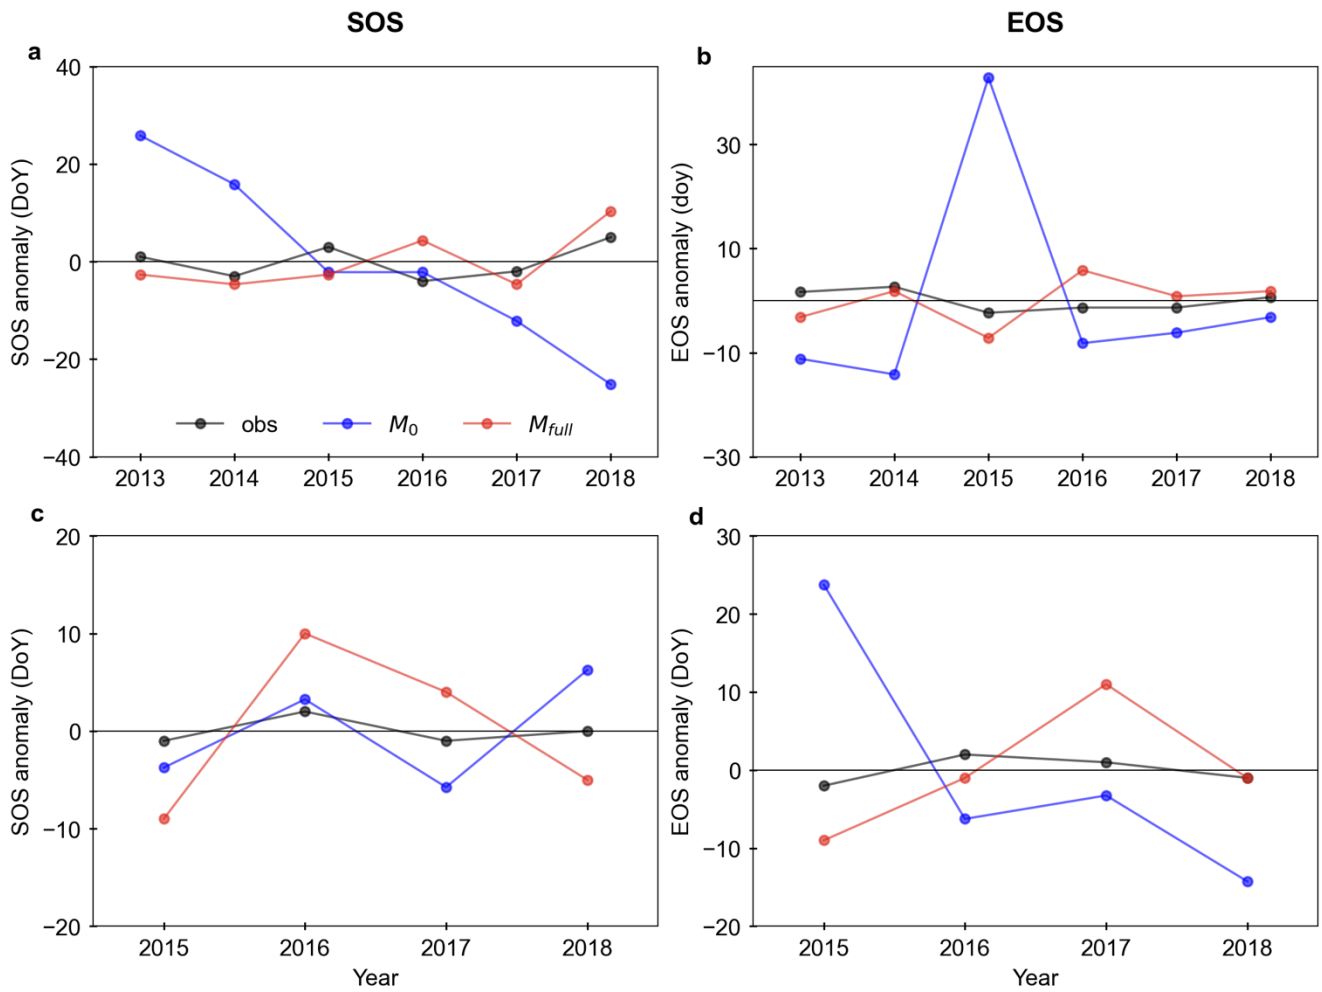

Fig. S6 Observed (obs, black line) and predicted (M0: blue, Mfull: red) the interannual variability in anomaly of start of season (SOS, a, c) and end of season (EOS, b, d) for deciduous broadleaf at two unseen sites alligatorriver (a, b) and umichbiological2 (c, d)
